# Supplementary material
Source: PubMed Central journal article supplement (PMC3477264)
Supplement: NIHMS397624-supplement-1_si_001.pdf [file NIHMS397624-supplement-1_si_001.pdf]

# 2C-Methyl-D-erythritol 4-phosphate enhances and sustains cyclodiphosphate synthase IspF activity

*J. Kipchirchir Bitok and Caren Freel Meyers\**

Department of Pharmacology and Molecular Sciences, Johns Hopkins University School of Medicine, Baltimore, Maryland 21205.

\*Corresponding author: [cmeyers8@jhmi.edu](mailto:cmeyers8@jhmi.edu)

## SUPPORTING INFORMATION

### Table of Contents

|                                                                                                     | <u>Page</u> |
|-----------------------------------------------------------------------------------------------------|-------------|
| Figure S1: SDS-PAGE of C-His <sub>6</sub> IspF purification by affinity chromatography.....         | 2           |
| Figure S2: <sup>1</sup> H – <sup>31</sup> P NMR and HPLC characterization of the IspF reaction..... | 3           |
| Figure S3: Dependence of IspF rate on pH.....                                                       | 4           |
| Figure S4: Michaelis-Menten kinetics of IspF, IspF-MEP and IspF-ME.....                             | 5           |
| Figure S5: IspF inhibition by CDP.....                                                              | 6           |
| Table S1: Rates of CMP formation in the presence or absence of additives.....                       | 7           |
| Figure S6: Evaluation of Glycerol and DDM as stabilizers.....                                       | 8           |
| Figure S7: AC <sub>50</sub> determinations of MEP and ME.....                                       | 9           |
| Table S2. Effects of CDP and isoprenoid diphosphates on the activity of the IspF-MEP complex.....   | 10          |

**Figure S1:** *Ni<sup>2+</sup>* affinity purification of C-His<sub>6</sub> *E. coli* IspF. IspF was eluted 5-500 mM imidazole.

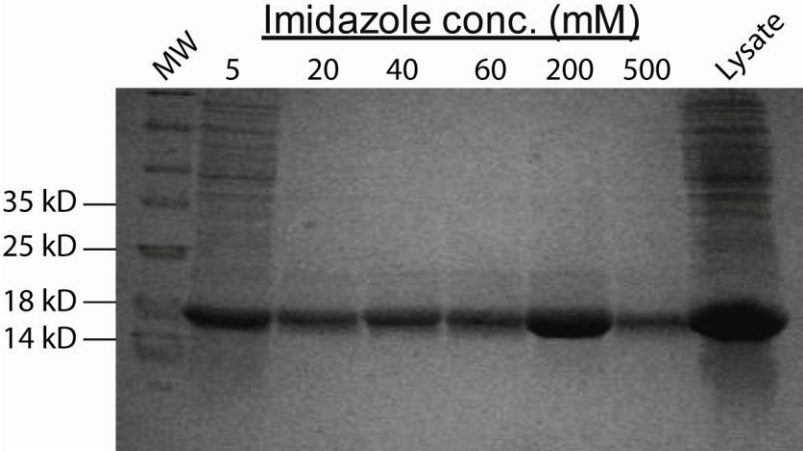

**Figure S2: *IspF*-catalyzed MEcDP and CMP formation.** Formation of MEcDP was confirmed using  $^1\text{H} - ^{31}\text{P}$  two-dimensional NMR (Figure S2a,b). A reaction containing 50 mM phosphate buffer, pH 7.4, 5 mM  $\text{MgCl}_2$ , 2 mM 4-diphosphocytidyl-2C-methyl-D-erythritol-2-phosphate, 1.5  $\mu\text{M}$  *IspF* and 50  $\mu\text{g/mL}$  BSA in a total volume of 150  $\mu\text{L}$  was analyzed by H-P-NMR. NMR analysis was carried out following reported procedures.<sup>1, 2</sup> Magnetization transfers in NMR experiments are depicted in blue ( $^1\text{H} \rightarrow ^{31}\text{P}$ ) and red ( $^{31}\text{P} \rightarrow ^{31}\text{P}$ ). **(a)** Constant-time CT  $^1\text{H} - ^{31}\text{P}$  HSQC showing  $\text{H}_1:\text{P}_\text{A}$ ,  $\text{H}_5:\text{P}_\text{A}$ , and  $\text{H}_4:\text{P}_\text{B}$  correlations. **(b)** CT  $^1\text{H} - ^{31}\text{P} - ^{31}\text{P}$  COSY spectrum indicating magnetization transfer between  $\text{P}_\text{A}$  and  $\text{P}_\text{B}$ . This is evident in  $\text{H}_1:\text{P}_\text{B}$ ,  $\text{H}_5:\text{P}_\text{B}$ , and  $\text{H}_4:\text{P}_\text{A}$  correlations. **(c)** HPLC stackplot showing *IspF*-catalyzed conversion of CDPME2P to CMP.

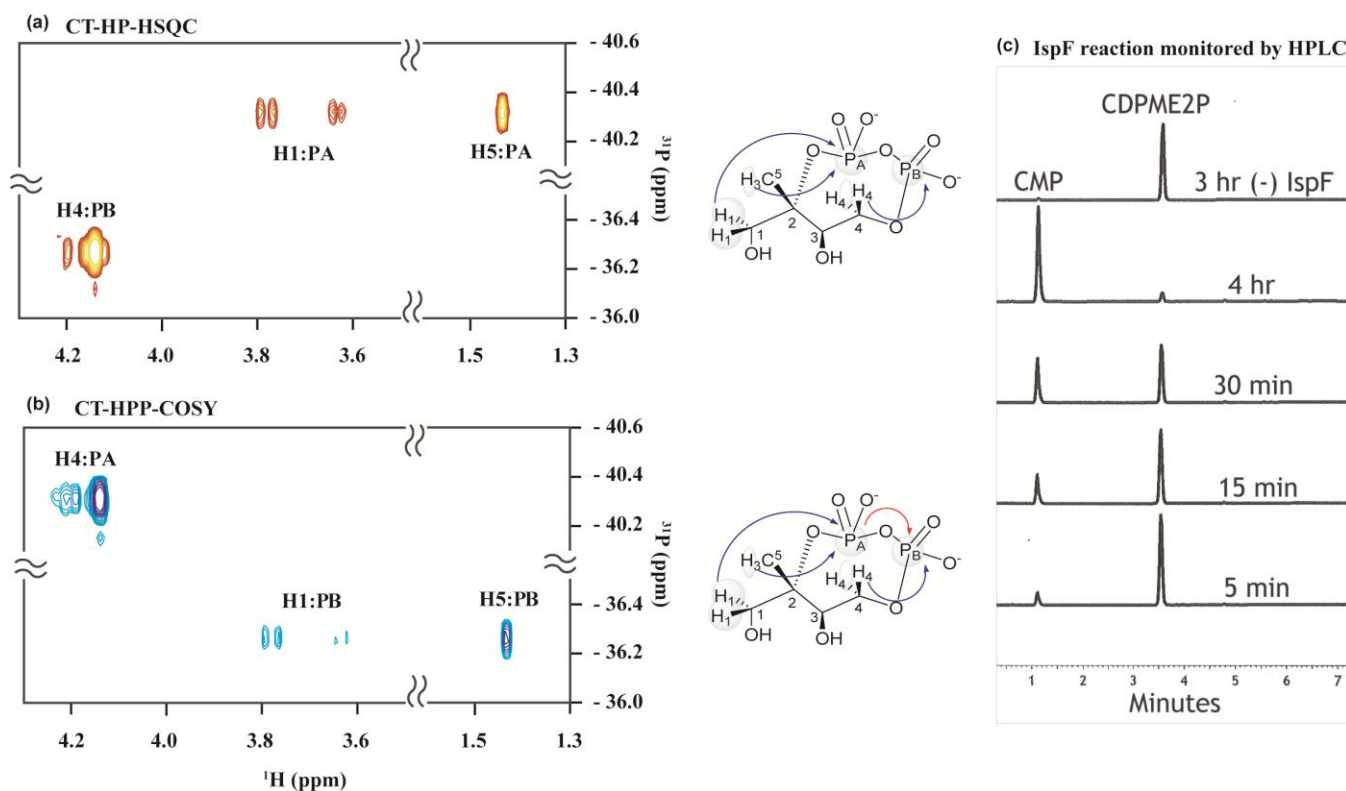

**Figure S3: Dependence of IspF rate on pH.** The dependence of IspF initial rate on pH was determined following the described general IspF assay. Each reaction contained 200  $\mu\text{M}$  4-diphosphocytidyl-2C-methyl-D-erythritol-2-phosphate at pH 6.0, 7.0, 7.4, 8.0, 9.0 and 10.0. HPLC sample preparation and analyses were carried out as described. IspF showed apparent maximal activity at pH 7.4.

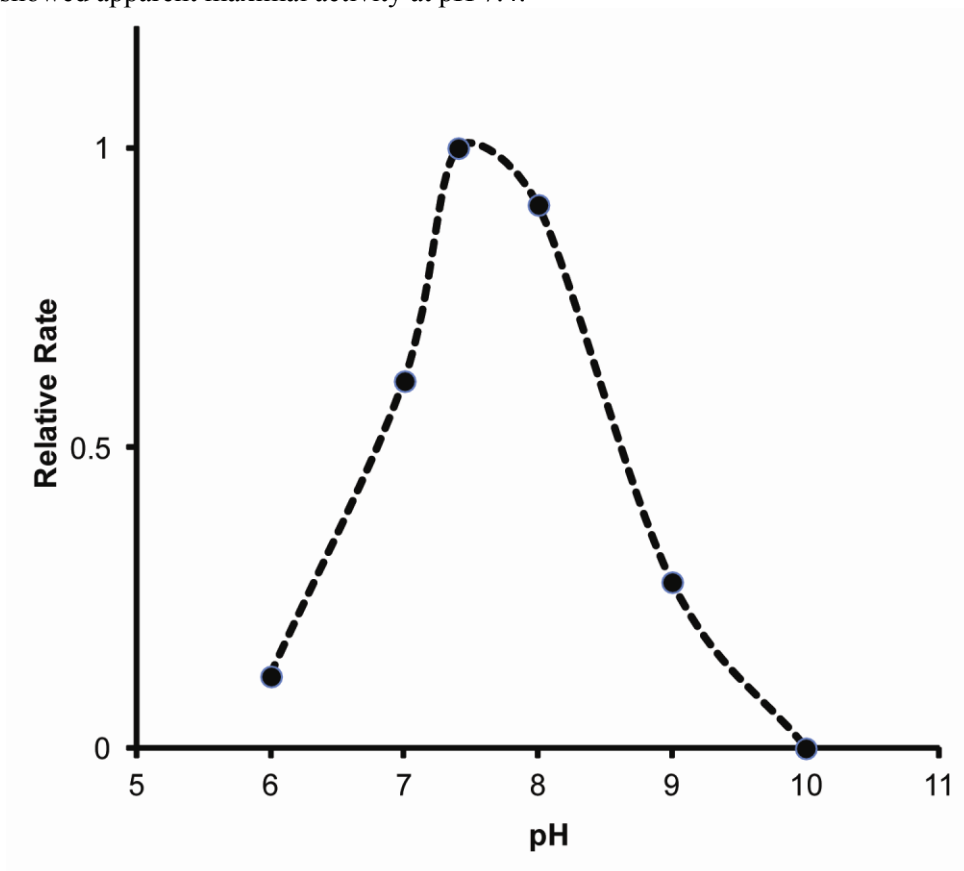

**Figure S4: Michaelis-Menten kinetic analyses.** IspF-catalyzed formation of CMP was kinetically characterized in the absence or presence of additives at 20°C. (a) Kinetic parameters of IspF in the absence of additives; (b) Kinetic parameters of IspF in the presence of 500  $\mu\text{M}$  MEP; (c) Kinetic parameters of IspF in the presence of 500  $\mu\text{M}$  ME.

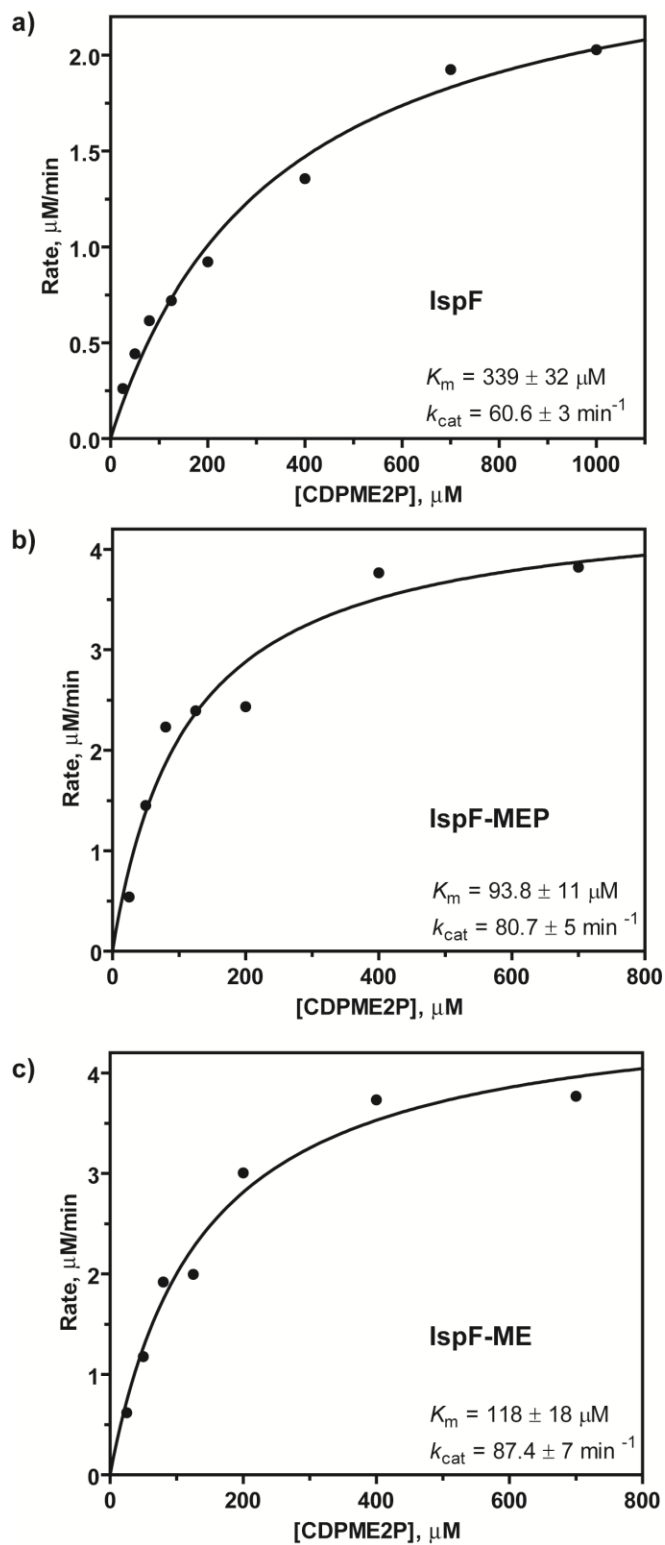

**Figure S5: *IspF* inhibition by CDP.** Concentrations of CDP used were in the range 0.1-1000  $\mu\text{M}$ . The  $\text{IC}_{50}$  was calculated using GraFit software version 7 (Figure S5).<sup>3</sup>

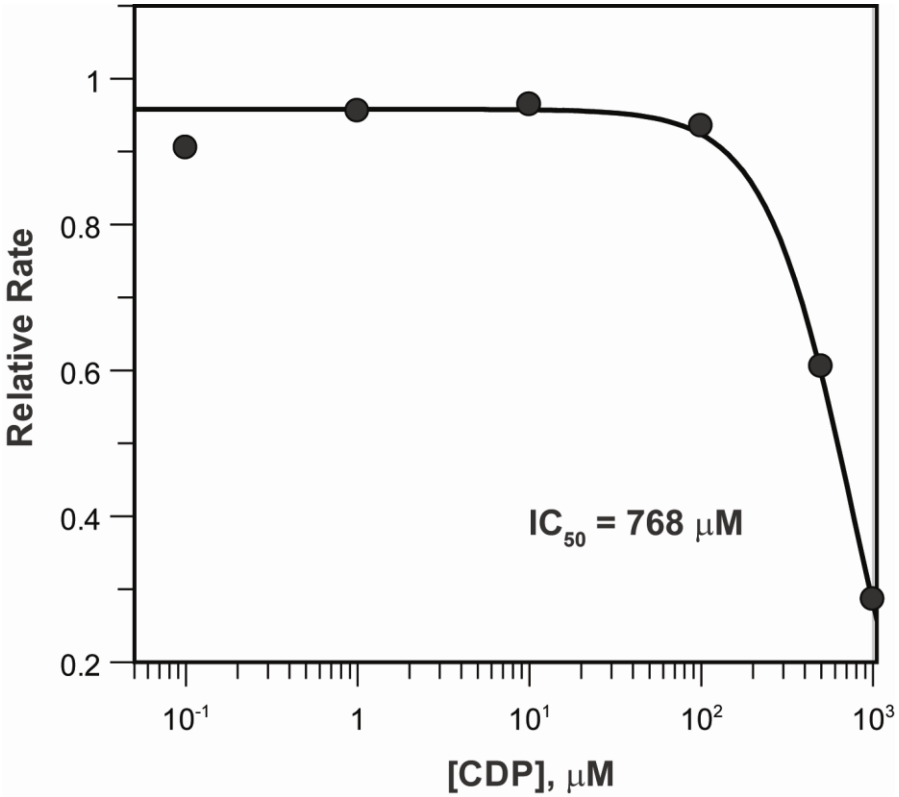

**Table S1. Rates of *IspF*-catalyzed CMP formation in the presence or absence of additives:** isopentenyl diphosphate (IDP), dimethylallyl diphosphate (DMADP), geranyl diphosphate (GDP), farnesyl diphosphate (FDP), 1-deoxy-D-xylulose 5-phosphate (DXP), 4-diphosphocytidyl-2C-methyl-D-erythritol (CDPME), (*E*)-4-hydroxy-3-methylbut-2-enyl diphosphate (HMBDP), 2C-methyl-D-erythritol 4-phosphate (MEP), Deoxyxylulose (DX), D-erythritol 4-phosphate (EP), or 2C-methyl-D-erythritol (ME).

|                          | <sup>a</sup> Time, (min) | Rate, $\mu\text{M} \cdot \text{min}^{-1}$ | Relative Rate |
|--------------------------|--------------------------|-------------------------------------------|---------------|
| Control                  |                          | 1.12 ± 0.22                               | 1.00          |
| <sup>b</sup> 1:4:2       |                          | 1.35 ± 0.13                               | 1.21          |
| <sup>b</sup> 10:40:20    |                          | 1.22 ± 0.16                               | 1.09          |
| <sup>b</sup> 100:400:200 |                          | 1.57 ± 0.04                               | 1.40          |
| <sup>b</sup> 200:800:400 |                          | 1.42 ± 0.21                               | 1.27          |
|                          |                          |                                           |               |
| Control                  | 0                        | 1.10 ± 0.15                               | 1.00          |
|                          | 30                       | 0.12 ± 0.04                               | 0.11          |
|                          | 24 h                     | 0                                         | 0.00          |
| <sup>c</sup> IDP         | 0                        | 1.74 ± 0.23                               | 1.58          |
|                          | 30                       | 0.33 ± 0.11                               | 0.30          |
| <sup>c</sup> DMADP       | 0                        | 1.88 ± 0.41                               | 1.70          |
|                          | 30                       | 0.34 ± 0.02                               | 0.31          |
| <sup>c</sup> GDP         | 0                        | 1.97 ± 0.18                               | 1.79          |
|                          | 30                       | 0.66 ± 0.04                               | 0.59          |
| <sup>c</sup> FDP         | 0                        | 1.16 ± 0.07                               | 1.05          |
|                          | 30                       | 0.41 ± 0.08                               | 0.37          |
| <sup>c</sup> DXP         | 0                        | 1.07 ± 0.22                               | 0.96          |
|                          | 30                       | 0.17 ± 0.05                               | 0.16          |
| <sup>c</sup> CDPME       | 0                        | 1.24 ± 0.24                               | 1.12          |
|                          | 30                       | 0.19 ± 0.03                               | 0.17          |
| <sup>c</sup> HMBDP       | 0                        | 1.57 ± 0.18                               | 1.43          |
|                          | 30                       | 0.28 ± 0.01                               | 0.25          |
| <sup>c</sup> MEP         | 0                        | 2.25 ± 0.13                               | 2.03          |
|                          | 30                       | 1.99 ± 0.11                               | 1.80          |
|                          | 24 h                     | 2.19 ± 0.21                               | 1.99          |
| <sup>c</sup> DX          | 0                        | 1.15 ± 0.19                               | 1.04          |
|                          | 30                       | 0.25 ± 0.03                               | 0.23          |
| <sup>c</sup> EP          | 0                        | 1.46 ± 0.09                               | 1.33          |
|                          | 30                       | 0.31 ± 0.03                               | 0.28          |
| <sup>c</sup> ME          | 0                        | 2.17 ± 0.38                               | 1.97          |
|                          | 30                       | 2.12 ± 0.05                               | 1.92          |
|                          | 24 h                     | 1.91 ± 0.09                               | 1.73          |

<sup>a</sup>Pre-incubation time, before the reaction was initiated with the substrate CDPME2P.

<sup>b</sup>Ratio of IDP:GDP:FDP concentrations in  $\mu\text{M}$ . <sup>c</sup>Used at a final concentration of 500  $\mu\text{M}$ .

**Figure S6: Evaluation of activity-enhancing or activity-stabilizing properties of glycerol and *n*-dodecyl  $\beta$ -D-maltoside (DDM).** The IspF reaction was carried out in the presence of known enzyme stabilizers, glycerol (500  $\mu$ M) or DDM (0.005%). (a) Structures of glycerol and DDM; (b) Rate of CMP formation in the presence of 500  $\mu$ M glycerol, or 0.005% DDM. (c) Summary of the effects of the enzyme stabilizers in (b).

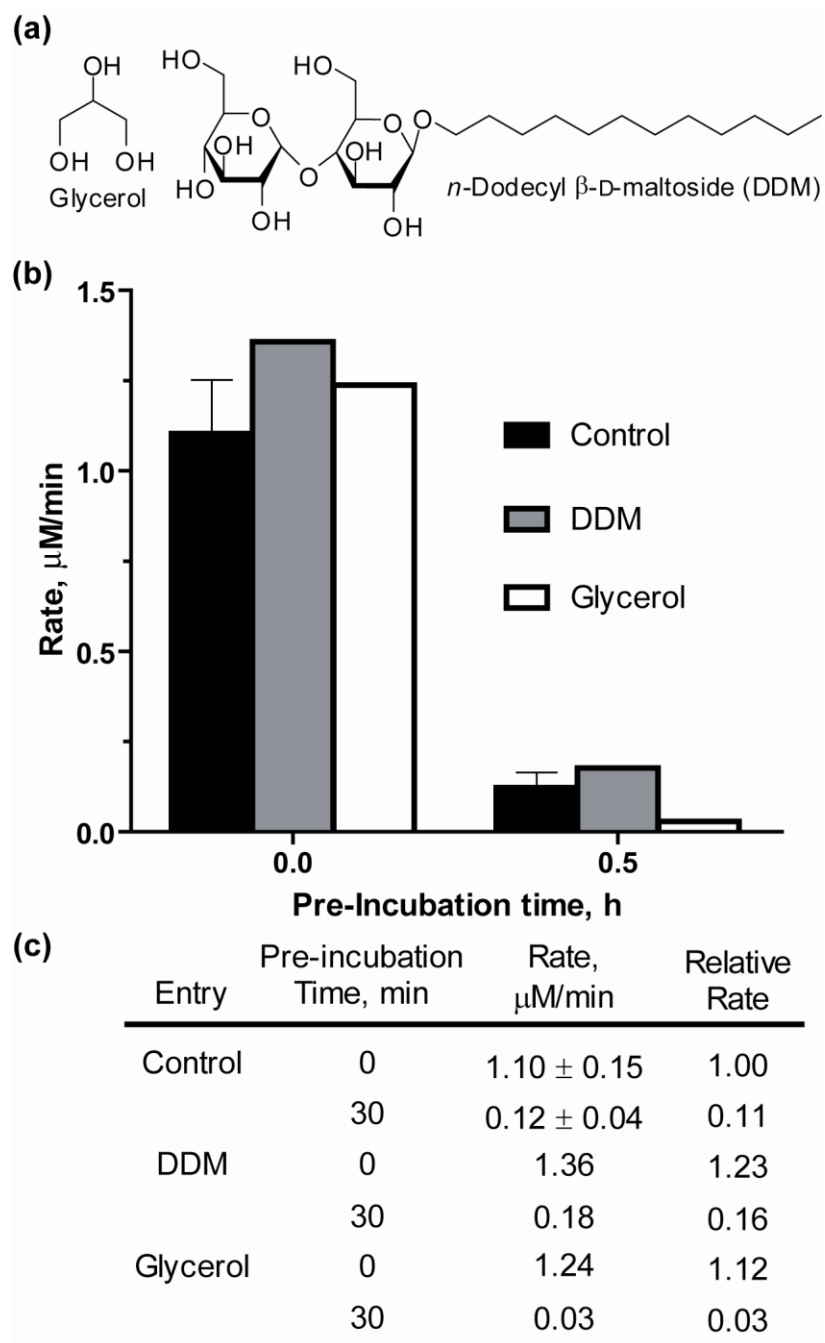



**Figure S7:  $AC_{50}$  determinations of MEP and ME.** Representative  $AC_{50}$  determinations for MEP (a) or ME (b) in the presence of 100  $\mu\text{M}$  CDPME2P at 20  $^{\circ}\text{C}$ .

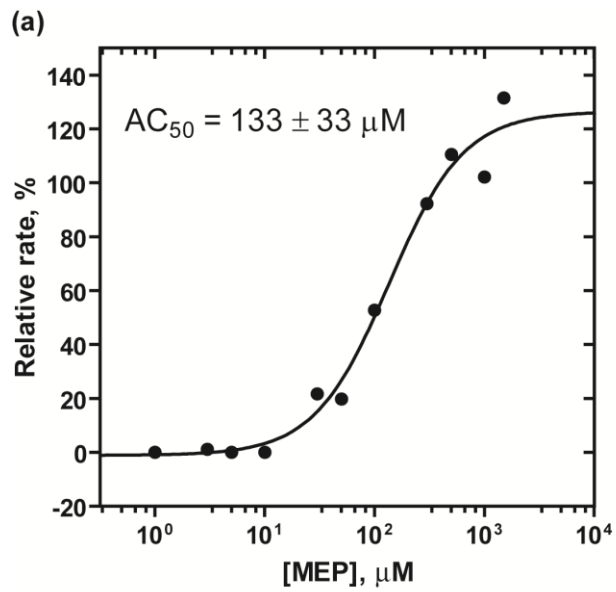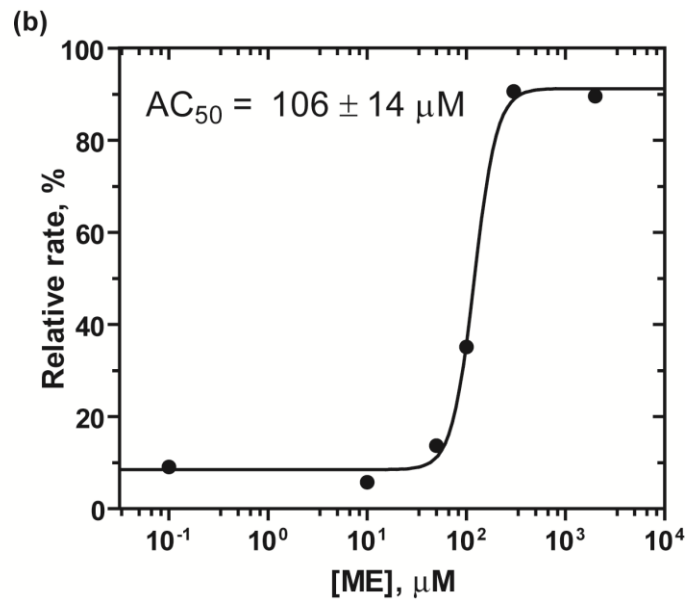

**Table S2. Effects of CDP and isoprenoid diphosphates on the activity of the IspF-MEP complex.**

| <b>Conditions</b> | <b>Rate, <math>\mu\text{M} \cdot \text{min}^{-1}</math></b> |
|-------------------|-------------------------------------------------------------|
| (-) MEP control   | 1.10 $\pm$ 0.15                                             |
| (-) MEP (+) CDP   | 0.45 $\pm$ 0.02                                             |
| (+) MEP control   | 2.06 $\pm$ 0.07                                             |
| (+) MEP (+) CDP   | 2.28 $\pm$ 0.29                                             |
| (+) MEP (+) HMBDP | 2.20 $\pm$ 0.31                                             |
| (+) MEP (+) IDP   | 2.10 $\pm$ 0.37                                             |
| (+) MEP (+) DMADP | 2.34 $\pm$ 0.28                                             |
| (+) MEP (+) GDP   | 2.03 $\pm$ 0.24                                             |
| (+) MEP (+) FDP   | 1.17 $\pm$ 0.21                                             |

## REFERENCES

1. Majumdar, A.; Shah, M. H.; Bitok, J. K.; Hassis-LeBeau, M.; Freel Meyers, C. L. Probing phosphorylation by non-mammalian isoprenoid biosynthetic enzymes using  $^1\text{H}$ - $^{31}\text{P}$ - $^{31}\text{P}$  correlation NMR spectroscopy. *Mol. BioSyst.* **2009**, *5*, 935–944.
2. Majumdar, A.; Sun, Y.; Shah, M.; Freel Meyers, C. L. Versatile  $^1\text{H}$ - $^{31}\text{P}$ - $^{31}\text{P}$  COSY 2D NMR Techniques for the Characterization of Polyphosphorylated Small Molecules. *J. Org. Chem.* **2010**, *75*, 3214–3223.
3. Leatherbarrow, R. J. *GraFit Version 7*, Erithacus Software Ltd., Horley, U.K. **2010**, .
